# Supplementary material for: Music Festival Makes Hedgehogs Move: How Individuals Cope Behaviorally in Response to Human-Induced Stressors
Source: PubMed Central journal article supplement (PMC6680799; doi:10.3390/ani9070455), 2019-07-18
Supplement: animals-09-00455-s001.pdf [file animals-09-00455-s001.pdf]

**Table S1.** Predicted differences from the fitted models. KDE50, resting, locomotion, balling up, other, and DFC are on their original scale. The KDE50 is measured in hectares, the behaviour variables are counts and the DFC is a proportion. Diurnality was transformed by adding 1 than calculating the natural logarithm. Calculation the exponential of these differences the results represents the differences as a proportion. TSdusk was transformed by adding the absolute value of the lowest TSdusk value to all TSdusk values to get only positive values. The differences still represent the difference in hours. The ODBA was transformed using the z-score. The differences represent changes in the magnitudes of standard deviations.

| Parameter  | ID         | Prediction | 95% CI Lower | 95% CI Upper |
|------------|------------|------------|--------------|--------------|
| KDE50      | 01_2016    | -0.9       | -1.17        | -0.74        |
|            | 02_2016    | -0.12      | -0.34        | 0.10         |
|            | 08_2016    | -0.91      | -1.13        | -0.68        |
|            | 09_2016    | -1.44      | -1.77        | -1.10        |
|            | 13_2016    | -0.06      | -0.28        | 0.16         |
|            | 17_2016    | -0.86      | -1.09        | -0.63        |
|            | 19_2016    | -1.73      | -1.95        | -1.51        |
|            | 21_2016    | -1.42      | -1.64        | -1.20        |
| Resting    | 01_2016    | -35.87     | -50.43       | -21.32       |
|            | 02_2016    | -9.85      | -29.10       | 9.40         |
|            | 08_2016    | -68.23     | -85.12       | -51.34       |
|            | 13_2016    | -9.50      | -25.60       | 6.61         |
|            | 17_2016    | -36.50     | -52.52       | -20.48       |
|            | 19_2016    | -19.73     | -35.18       | -4.28        |
|            | 21_2016    | -2.18      | -17.38       | 13.03        |
|            | Locomotion | 01_2016    | -7.25        | -21.86       |
| 02_2016    |            | 71.82      | 52.10        | 91.55        |
| 08_2016    |            | -32.29     | -48.49       | -16.09       |
| 13_2016    |            | 118.34     | 102.06       | 134.62       |
| 17_2016    |            | -87.39     | -103.65      | -71.14       |
| 19_2016    |            | -6.87      | -22.48       | 8.73         |
| 21_2016    |            | 0.60       | -14.49       | 15.68        |
| Balling up |            | 01_2016    | 94.23        | 67.43        |
|            | 02_2016    | -186.25    | -222.76      | -149.73      |
|            | 08_2016    | 96.77      | 67.07        | 126.47       |

|            |         |        |         |        |
|------------|---------|--------|---------|--------|
|            | 13_2016 | -20.82 | -50.52  | 8.88   |
|            | 17_2016 | 181.41 | 151.62  | 211.20 |
|            | 19_2016 | 73.86  | 45.24   | 102.49 |
|            | 21_2016 | 21.04  | -6.62   | 48.70  |
|            | 01_2016 | -50.54 | -68.05  | -33.02 |
|            | 02_2016 | 120.74 | 96.78   | 144.69 |
|            | 08_2016 | 8.34   | -11.06  | 27.74  |
| other      | 13_2016 | -88.29 | -107.74 | -68.84 |
|            | 17_2016 | -56.08 | -75.48  | -36.67 |
|            | 19_2016 | -47.81 | -66.51  | -29.11 |
|            | 21_2016 | -21.62 | -39.69  | -3.55  |
|            | 01_2016 | -0.25  | -0.34   | -0.16  |
|            | 02_2016 | -0.42  | -0.51   | -0.33  |
|            | 08_2016 | -0.20  | -0.29   | -0.10  |
| Diurnality | 09_2016 | -0.37  | -0.50   | -0.24  |
|            | 13_2016 | -0.25  | -0.34   | -0.17  |
|            | 17_2016 | -0.06  | -0.16   | 0.04   |
|            | 19_2016 | 0.08   | -0.01   | 0.18   |
|            | 21_2016 | -0.08  | -0.17   | 0.01   |
|            | 01_2016 | 0.40   | 0.28    | 0.51   |
|            | 02_2016 | 0.04   | -0.07   | 0.15   |
|            | 08_2016 | 0.87   | 0.75    | 0.99   |
| Tsdusk     | 09_2016 | 0.09   | -0.07   | 0.25   |
|            | 13_2016 | 1.06   | 0.94    | 1.17   |
|            | 17_2016 | 0.76   | 0.63    | 0.89   |
|            | 19_2016 | 0.59   | 0.48    | 0.70   |
|            | 21_2016 | 0.25   | 0.13    | 0.36   |
|            | 01_2016 | -0.23  | -0.39   | -0.08  |
|            | 02_2016 | 0.34   | 0.13    | 0.55   |
|            | 08_2016 | -0.60  | -0.78   | -0.43  |
| ODBA       | 13_2016 | 0.12   | -0.06   | 0.29   |
|            | 17_2016 | -1.16  | -1.33   | -0.98  |
|            | 19_2016 | 0.55   | 0.38    | 0.72   |
|            | 21_2016 | -0.45  | -0.61   | -0.29  |
|            | 01_2016 | 0.01   | -0.01   | 0.03   |
|            | 02_2016 | 0.14   | 0.12    | 0.16   |
|            | 08_2016 | -0.15  | -0.17   | -0.13  |
| DFC        | 09_2016 | -0.17  | -0.20   | -0.13  |
|            | 13_2016 | -0.09  | -0.11   | -0.07  |
|            | 17_2016 | -0.07  | -0.09   | -0.05  |
|            | 19_2016 | -0.08  | -0.10   | -0.06  |
|            | 21_2016 | -0.13  | -0.15   | -0.10  |

Table S2. Results for the nightly used area for all individuals.

| Animal_ID | Phase        | mcp_95 | mcp95_ci | kde_95 | kde95_ci | kde_50 | kde50_ci |
|-----------|--------------|--------|----------|--------|----------|--------|----------|
| 01_2016   | festival     | 2.87   | 0.88     | 9.10   | 3.43     | 2.14   | 0.85     |
| 01_2016   | pre-festival | 4.20   | 1.48     | 14.00  | 7.25     | 3.10   | 1.50     |
| 02_2016   | festival     | 2.74   | 0.69     | 7.68   | 1.75     | 1.93   | 0.51     |
| 02_2016   | pre-festival | 2.83   | 0.76     | 7.84   | 2.09     | 2.02   | 0.55     |
| 08_2016   | festival     | 1.34   | 0.42     | 4.25   | 1.65     | 1.09   | 0.46     |
| 08_2016   | pre-festival | 2.65   | 0.47     | 7.95   | 1.61     | 1.99   | 0.45     |
| 09_2016   | festival     | 3.19   | 1.39     | 8.43   | 3.10     | 2.12   | 0.81     |
| 09_2016   | pre-festival | 4.98   | 1.08     | 13.57  | 2.73     | 3.59   | 0.75     |
| 13_2016   | festival     | 1.63   | 0.32     | 4.59   | 0.92     | 1.04   | 0.25     |
| 13_2016   | pre-festival | 1.95   | 0.50     | 4.57   | 1.22     | 1.07   | 0.29     |
| 17_2016   | festival     | 0.93   | 0.47     | 2.45   | 1.26     | 0.60   | 0.35     |

|         |              |      |      |       |      |      |      |
|---------|--------------|------|------|-------|------|------|------|
| 17_2016 | pre-festival | 2.57 | 0.56 | 6.33  | 1.40 | 1.46 | 0.32 |
| 19_2016 | festival     | 1.62 | 0.69 | 5.02  | 1.91 | 1.26 | 0.51 |
| 19_2016 | pre-festival | 2.95 | 0.71 | 11.82 | 2.84 | 3.02 | 0.85 |
| 21_2016 | festival     | 4.03 | 1.25 | 11.48 | 3.26 | 2.92 | 0.96 |
| 21_2016 | pre-festival | 6.49 | 1.08 | 16.93 | 2.86 | 4.36 | 0.82 |

Shown are mean values of MCP 95%, KDE 95% and KDE 50% for each individual separated by the phase of the festival. CI denoted the 95% confidence interval of the mean areas.

**Table 3.** Individual nesting data. Every unique nest got a unique id. Repeated usage of the same nest is depicted through the nesttime in days.

| Sex | Individual | Nest | Nesttime | Censor | Coding | Research_Interval | Disturbance |
|-----|------------|------|----------|--------|--------|-------------------|-------------|
| m   | 1          | a    | 5        | yes    | 0      | before            | no          |
| m   | 1          | b    | 2        | no     | 1      | before            | no          |
| m   | 1          | c    | 11       | yes    | 0      | before            | no          |
| m   | 1          | c    | 3        | no     | 1      | during            | disturb     |
| m   | 1          | d    | 6        | no     | 1      | during            | disturb     |
| m   | 1          | e    | 1        | no     | 1      | during            | disturb     |
| m   | 1          | f    | 2        | no     | 1      | during            | disturb     |
| m   | 1          | g    | 1        | no     | 1      | during            | disturb     |
| m   | 1          | h    | 5        | yes    | 0      | during            | disturb     |
| m   | 1          | h    | 1        | no     | 1      | after             | no          |
| m   | 1          | i    | 4        | yes    | 0      | after             | no          |
| f   | 2          | a    | 5        | yes    | 0      | before            | no          |
| f   | 2          | b    | 2        | no     | 1      | before            | no          |
| f   | 2          | a    | 2        | no     | 1      | before            | no          |
| f   | 2          | b    | 1        | no     | 1      | before            | no          |
| f   | 2          | a    | 1        | no     | 1      | before            | no          |
| f   | 2          | b    | 1        | no     | 1      | before            | no          |
| f   | 2          | c    | 7        | yes    | 0      | before            | no          |
| f   | 2          | c    | 8        | no     | 1      | during            | disturb     |
| f   | 2          | d    | 1        | no     | 1      | during            | disturb     |
| f   | 2          | c    | 1        | no     | 1      | during            | disturb     |
| f   | 2          | d    | 1        | no     | 1      | during            | disturb     |
| f   | 2          | c    | 2        | no     | 1      | during            | disturb     |
| f   | 2          | d    | 5        | no     | 1      | during            | disturb     |
| f   | 2          | d    | 5        | yes    | 0      | after             | no          |
| m   | 5          | a    | 2        | yes    | 0      | before            | no          |
| m   | 5          | b    | 1        | no     | 1      | before            | no          |
| m   | 5          | a    | 10       | no     | 1      | before            | no          |
| m   | 5          | c    | 4        | no     | 1      | before            | no          |
| m   | 5          | d    | 1        | no     | 1      | before            | no          |
| m   | 5          | e    | 1        | yes    | 0      | before            | no          |
| f   | 7          | a    | 4        | yes    | 0      | before            | no          |
| f   | 7          | b    | 1        | no     | 1      | before            | no          |
| f   | 7          | a    | 1        | no     | 1      | before            | no          |
| f   | 7          | b    | 1        | no     | 1      | before            | no          |
| f   | 7          | a    | 1        | no     | 1      | before            | no          |
| f   | 7          | b    | 11       | yes    | 0      | before            | no          |
| f   | 7          | b    | 10       | yes    | 0      | during            | disturb     |
| f   | 7          | b    | 2        | yes    | 0      | after             | no          |
| f   | 8          | a    | 16       | yes    | 0      | before            | no          |
| f   | 8          | b    | 1        | yes    | 0      | before            | no          |
| f   | 8          | c    | 1        | no     | 1      | during            | disturb     |

|   |    |   |   |     |   |        |         |
|---|----|---|---|-----|---|--------|---------|
| f | 8  | d | 5 | no  | 1 | during | disturb |
| f | 8  | e | 6 | no  | 1 | during | disturb |
| f | 8  | d | 1 | no  | 1 | during | disturb |
| f | 8  | e | 2 | no  | 1 | during | disturb |
| f | 8  | f | 1 | no  | 1 | during | disturb |
| f | 8  | g | 2 | yes | 0 | during | disturb |
| f | 8  | g | 5 | yes | 0 | after  | no      |
| m | 9  | a | 2 | yes | 0 | before | no      |
| m | 9  | b | 1 | no  | 1 | before | no      |
| m | 9  | a | 1 | no  | 1 | before | no      |
| m | 9  | b | 1 | no  | 1 | before | no      |
| m | 9  | c | 1 | no  | 1 | before | no      |
| m | 9  | a | 1 | no  | 1 | before | no      |
| m | 9  | c | 1 | no  | 1 | before | no      |
| m | 9  | d | 1 | no  | 1 | before | no      |
| m | 9  | c | 2 | yes | 0 | before | no      |
| m | 9  | d | 1 | no  | 1 | before | no      |
| m | 9  | c | 1 | no  | 1 | before | no      |
| m | 9  | d | 1 | no  | 1 | before | no      |
| m | 9  | e | 1 | no  | 1 | before | no      |
| m | 9  | d | 1 | yes | 0 | before | no      |
| m | 9  | f | 1 | yes | 0 | before | no      |
| m | 9  | f | 1 | no  | 1 | during | disturb |
| m | 9  | d | 1 | no  | 1 | during | disturb |
| m | 9  | f | 2 | yes | 0 | during | disturb |
| m | 9  | f | 3 | no  | 1 | during | disturb |
| m | 9  | g | 1 | no  | 1 | during | disturb |
| m | 9  | h | 6 | no  | 1 | during | disturb |
| m | 9  | i | 2 | yes | 0 | during | disturb |
| m | 9  | j | 5 | yes | 0 | after  | no      |
| m | 10 | a | 1 | yes | 0 | before | no      |
| m | 10 | b | 1 | yes | 0 | before | no      |
| m | 10 | a | 1 | yes | 0 | before | no      |
| m | 10 | c | 5 | yes | 0 | before | no      |
| m | 11 | a | 5 | yes | 0 | before | no      |
| m | 11 | b | 2 | no  | 1 | before | no      |
| m | 11 | a | 1 | no  | 1 | before | no      |
| m | 11 | c | 3 | no  | 1 | before | no      |
| m | 11 | b | 1 | no  | 1 | before | no      |
| m | 11 | c | 1 | no  | 1 | before | no      |
| m | 11 | a | 1 | no  | 1 | before | no      |
| m | 11 | c | 4 | no  | 1 | before | no      |
| m | 11 | d | 1 | yes | 0 | before | no      |
| m | 11 | c | 3 | no  | 1 | during | disturb |
| m | 11 | d | 1 | no  | 1 | during | disturb |
| m | 11 | c | 1 | no  | 1 | during | disturb |
| m | 11 | e | 1 | no  | 1 | during | disturb |
| m | 11 | d | 1 | no  | 1 | during | disturb |
| m | 11 | a | 1 | no  | 1 | during | disturb |
| m | 11 | e | 2 | no  | 1 | during | disturb |
| m | 11 | d | 1 | no  | 1 | during | disturb |
| m | 11 | e | 2 | no  | 1 | during | disturb |
| m | 11 | d | 1 | no  | 1 | during | disturb |
| f | 13 | a | 1 | yes | 0 | before | no      |
| f | 13 | b | 1 | no  | 1 | before | no      |
| f | 13 | c | 2 | no  | 1 | before | no      |

|   |    |   |    |     |   |        |         |
|---|----|---|----|-----|---|--------|---------|
| f | 13 | d | 7  | no  | 1 | before | no      |
| f | 13 | c | 1  | no  | 1 | before | no      |
| f | 13 | e | 2  | no  | 1 | before | no      |
| f | 13 | d | 1  | no  | 1 | before | no      |
| f | 13 | f | 1  | no  | 1 | before | no      |
| f | 13 | e | 2  | no  | 1 | before | no      |
| f | 13 | d | 1  | yes | 0 | before | no      |
| f | 13 | d | 1  | no  | 1 | during | disturb |
| f | 13 | e | 1  | no  | 1 | during | disturb |
| f | 13 | d | 1  | no  | 1 | during | disturb |
| f | 13 | g | 2  | no  | 1 | during | disturb |
| f | 13 | f | 8  | no  | 1 | during | disturb |
| f | 13 | h | 5  | yes | 0 | during | disturb |
| f | 13 | i | 5  | yes | 0 | after  | no      |
| m | 14 | a | 2  | yes | 0 | before | no      |
| m | 14 | b | 4  | no  | 1 | before | no      |
| m | 14 | a | 3  | no  | 1 | before | no      |
| m | 14 | b | 2  | no  | 1 | before | no      |
| m | 14 | a | 1  | no  | 1 | before | no      |
| m | 14 | b | 1  | no  | 1 | before | no      |
| m | 14 | c | 1  | no  | 1 | before | no      |
| m | 14 | b | 1  | no  | 1 | before | no      |
| m | 14 | d | 1  | no  | 1 | before | no      |
| m | 14 | b | 3  | yes | 0 | before | no      |
| m | 14 | d | 1  | no  | 1 | during | disturb |
| m | 14 | e | 7  | no  | 1 | during | disturb |
| m | 14 | f | 1  | no  | 1 | during | disturb |
| m | 14 | e | 1  | no  | 1 | during | disturb |
| m | 14 | f | 1  | no  | 1 | during | disturb |
| m | 14 | g | 1  | no  | 1 | during | disturb |
| m | 14 | f | 1  | no  | 1 | during | disturb |
| m | 14 | g | 1  | no  | 1 | during | disturb |
| m | 14 | h | 1  | no  | 1 | during | disturb |
| m | 14 | g | 3  | yes | 0 | during | disturb |
| m | 14 | g | 5  | yes | 0 | after  | no      |
| f | 16 | a | 1  | yes | 0 | before | no      |
| f | 16 | b | 2  | no  | 1 | before | no      |
| f | 16 | a | 1  | no  | 1 | before | no      |
| f | 16 | c | 1  | no  | 1 | before | no      |
| f | 16 | d | 1  | no  | 1 | before | no      |
| f | 16 | c | 1  | no  | 1 | before | no      |
| f | 16 | a | 1  | no  | 1 | before | no      |
| f | 16 | d | 2  | no  | 1 | before | no      |
| f | 16 | a | 1  | no  | 1 | before | no      |
| f | 16 | d | 7  | no  | 1 | before | no      |
| f | 16 | e | 1  | yes | 0 | before | no      |
| f | 16 | d | 1  | no  | 1 | during | disturb |
| f | 16 | e | 3  | no  | 1 | during | disturb |
| f | 16 | d | 9  | no  | 1 | during | disturb |
| f | 16 | f | 5  | yes | 0 | during | disturb |
| f | 16 | f | 5  | yes | 0 | after  | no      |
| f | 17 | a | 1  | yes | 0 | before | no      |
| f | 17 | b | 1  | no  | 1 | before | no      |
| f | 17 | a | 2  | no  | 1 | before | no      |
| f | 17 | b | 10 | no  | 1 | before | no      |
| f | 17 | c | 3  | no  | 1 | before | no      |

|   |    |   |    |     |   |        |         |
|---|----|---|----|-----|---|--------|---------|
| f | 17 | d | 1  | no  | 1 | before | no      |
| f | 17 | e | 1  | yes | 0 | before | no      |
| f | 17 | e | 10 | no  | 1 | before | disturb |
| f | 17 | f | 5  | no  | 1 | before | disturb |
| f | 17 | c | 3  | yes | 0 | during | disturb |
| f | 17 | c | 2  | no  | 1 | after  | no      |
| f | 17 | e | 2  | no  | 1 | after  | no      |
| f | 17 |   | 1  | yes | 0 | after  | no      |
| m | 18 | a | 18 | yes | 0 | before | no      |
| m | 18 | b | 1  | yes | 0 | before | no      |
| m | 18 | c | 4  | no  | 1 | during | disturb |
| m | 18 | d | 8  | no  | 1 | during | disturb |
| m | 18 | e | 6  | yes | 0 | during | disturb |
| m | 18 | e | 5  | yes | 0 | after  | no      |
| m | 19 | a | 1  | yes | 0 | before | no      |
| m | 19 | b | 2  | no  | 1 | before | no      |
| m | 19 | a | 1  | no  | 1 | before | no      |
| m | 19 | c | 1  | no  | 1 | before | no      |
| m | 19 | b | 1  | no  | 1 | before | no      |
| m | 19 | d | 5  | no  | 1 | before | no      |
| m | 19 | c | 1  | no  | 1 | before | no      |
| m | 19 | d | 2  | no  | 1 | before | no      |
| m | 19 | e | 1  | no  | 1 | before | no      |
| m | 19 | d | 4  | yes | 0 | before | no      |
| m | 19 | d | 3  | no  | 1 | during | disturb |
| m | 19 | f | 3  | no  | 1 | during | disturb |
| m | 19 | g | 3  | no  | 1 | during | disturb |
| m | 19 | h | 6  | no  | 1 | during | disturb |
| m | 19 | g | 3  | yes | 0 | during | disturb |
| m | 19 | g | 3  | no  | 1 | after  | no      |
| m | 19 | i | 2  | yes | 0 | after  | no      |
| f | 20 | a | 1  | yes | 0 | before | no      |
| f | 20 | b | 3  | no  | 1 | before | no      |
| f | 20 | c | 8  | no  | 1 | before | no      |
| f | 20 | d | 18 | yes | 0 | during | disturb |
| f | 20 | d | 5  | yes | 0 | after  | no      |
| m | 21 | a | 3  | yes | 0 | before | no      |
| m | 21 | b | 1  | no  | 1 | before | no      |
| m | 21 | c | 1  | no  | 1 | before | no      |
| m | 21 | b | 8  | no  | 1 | before | no      |
| m | 21 | d | 1  | yes | 0 | before | no      |
| m | 21 | b | 1  | no  | 1 | before | no      |
| m | 21 | c | 1  | no  | 1 | before | no      |
| m | 21 | d | 1  | yes | 0 | before | no      |
| m | 21 | b | 1  | no  | 1 | during | disturb |
| m | 21 | c | 1  | no  | 1 | during | disturb |
| m | 21 | b | 1  | no  | 1 | during | disturb |
| m | 21 | d | 2  | no  | 1 | during | disturb |
| m | 21 | b | 1  | no  | 1 | during | disturb |
| m | 21 | e | 1  | no  | 1 | during | disturb |
| m | 21 | f | 1  | no  | 1 | during | disturb |
| m | 21 | e | 3  | no  | 1 | during | disturb |
| m | 21 | b | 2  | no  | 1 | during | disturb |
| m | 21 | g | 1  | no  | 1 | during | disturb |
| m | 21 | e | 1  | no  | 1 | during | disturb |
| m | 21 | c | 1  | no  | 1 | during | disturb |

|   |    |   |   |     |   |        |         |
|---|----|---|---|-----|---|--------|---------|
| m | 21 | g | 1 | no  | 1 | during | disturb |
| m | 21 | h | 1 | yes | 0 | during | disturb |
| m | 21 | h | 3 | no  | 1 | after  | no      |
| m | 21 | d | 2 | yes | 0 | after  | no      |
| m | 22 | a | 1 | yes | 0 | before | no      |
| m | 22 | b | 2 | no  | 1 | before | no      |
| m | 22 | c | 2 | no  | 1 | before | no      |
| m | 22 | d | 1 | no  | 1 | before | no      |
| m | 22 | c | 1 | no  | 1 | before | no      |
| m | 22 | d | 2 | no  | 1 | before | no      |
| m | 22 | c | 1 | no  | 1 | before | no      |
| m | 22 | d | 1 | no  | 1 | before | no      |
| m | 22 | c | 1 | yes | 0 | before | no      |
| m | 22 | d | 1 | no  | 1 | during | disturb |
| m | 22 | a | 4 | no  | 1 | during | disturb |
| m | 22 | e | 1 | no  | 1 | during | disturb |
| m | 22 | f | 3 | no  | 1 | during | disturb |
| m | 22 | g | 2 | no  | 1 | during | disturb |
| m | 22 | h | 1 | no  | 1 | during | disturb |
| m | 22 | i | 2 | no  | 1 | during | disturb |
| m | 22 | h | 1 | no  | 1 | during | disturb |
| m | 22 | j | 1 | no  | 1 | during | disturb |
| m | 22 | h | 1 | no  | 1 | during | disturb |
| m | 22 | g | 1 | yes | 0 | during | disturb |
| m | 22 | h | 1 | no  | 1 | after  | no      |
| m | 22 | g | 2 | no  | 1 | after  | no      |
| m | 22 | h | 1 | no  | 1 | after  | no      |
| m | 22 | g | 1 | yes | 0 | after  | no      |
| m | 23 | a | 2 | yes | 0 | after  | no      |
| f | 24 | a | 9 | no  | 1 | during | disturb |
| f | 24 | b | 1 | no  | 1 | during | disturb |
| f | 24 | a | 5 | no  | 1 | during | disturb |
| f | 24 | b | 3 | yes | 0 | during | disturb |
| f | 24 | b | 5 | yes | 0 | after  | no      |





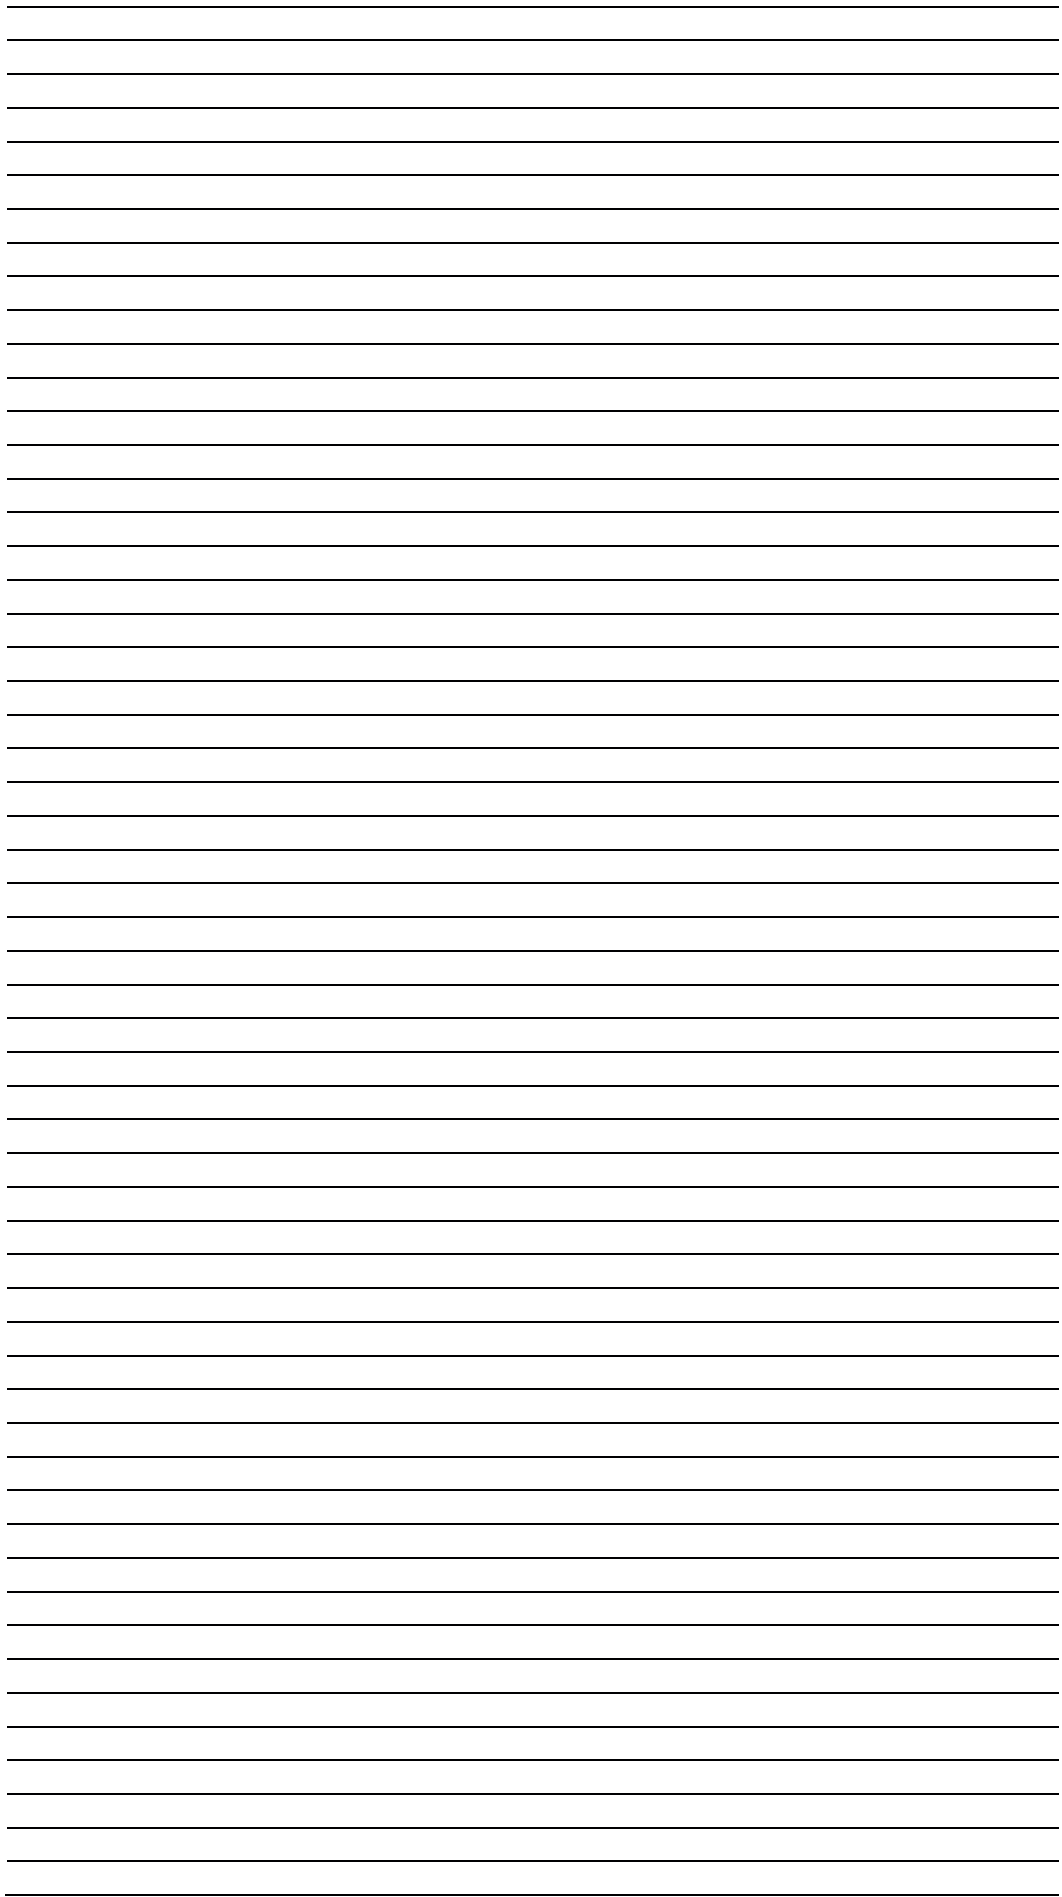







---

---

---

---

---

---

---

---

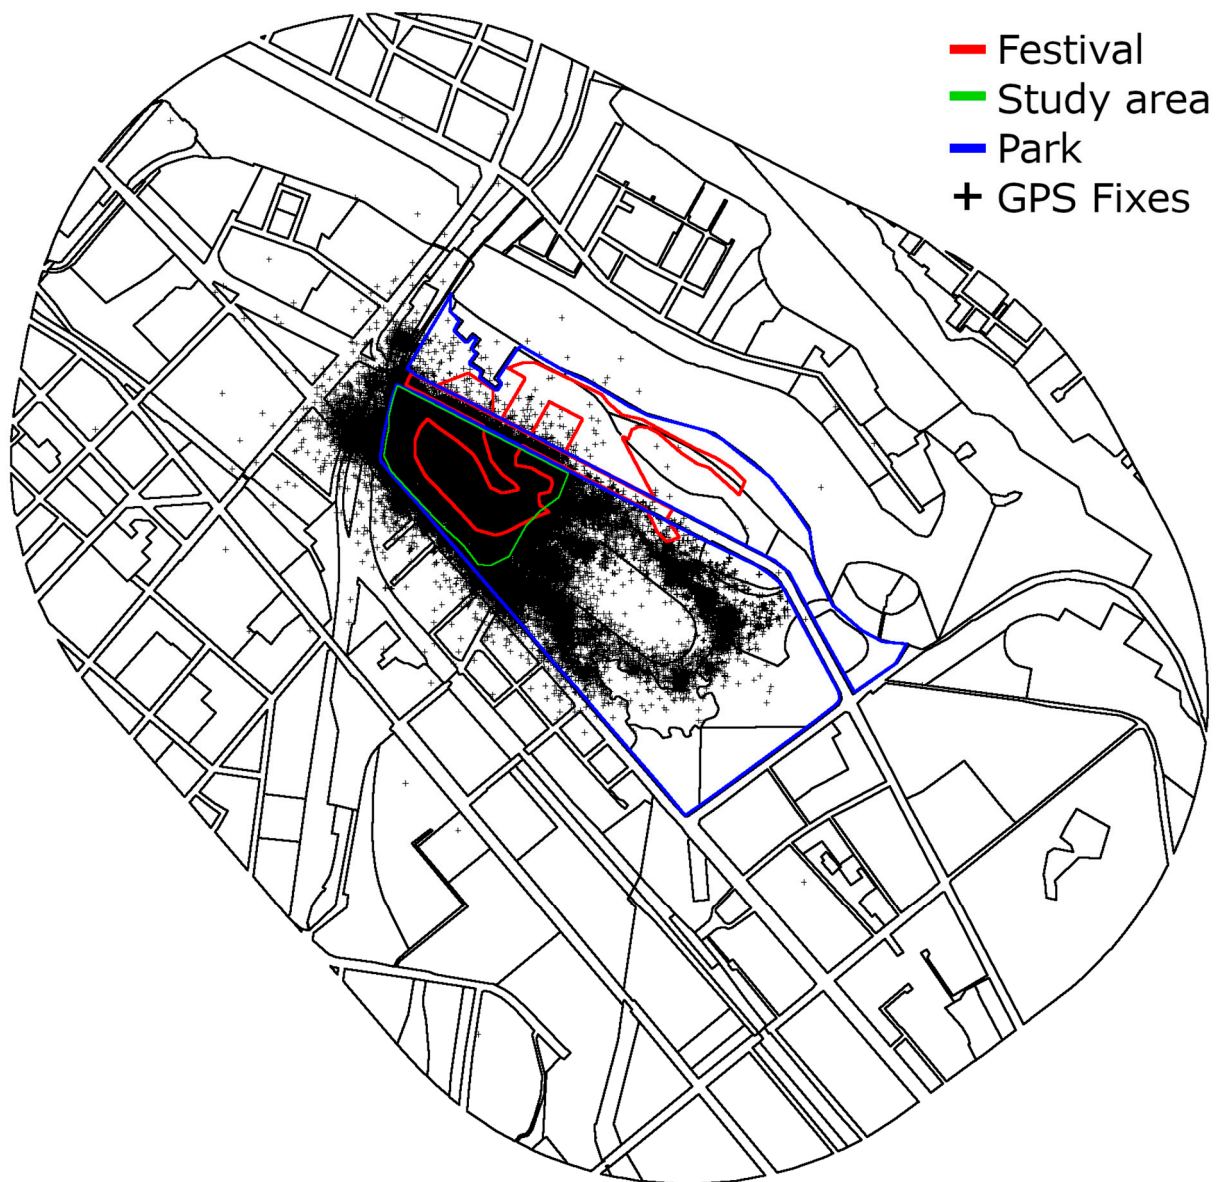

**Figure S1.** Map of the Park with surrounding area. The Park Area is indicated by the blue lines, the festival area is indicated by the red lines and the study area is indicated by the green line. GPS fixes are shown for all study hedgehogs. Supplementary Figures 3 and 4 show GPS fixes for only the pre-festival phase and the festival phase respectively. The majority of fixes are located in the study area. More than half of the study area was used for the festival. The study hedgehogs leave the park on a few occasions.

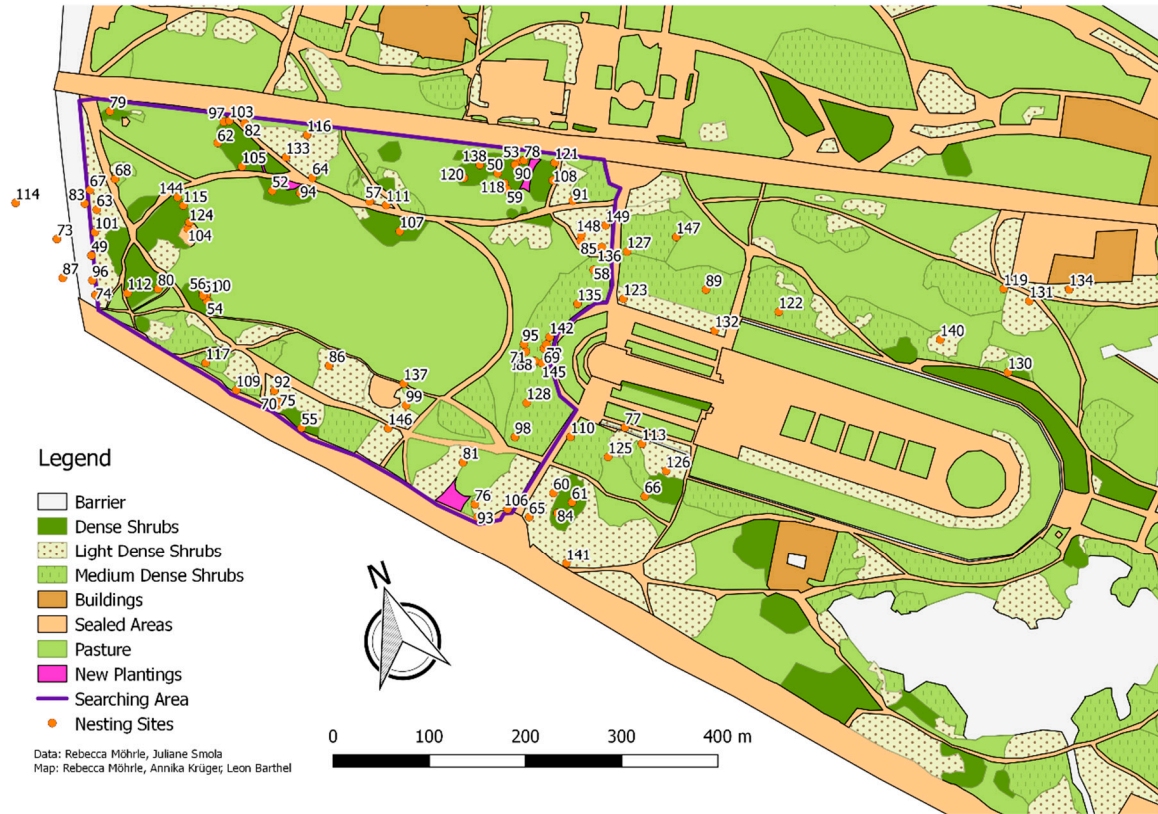

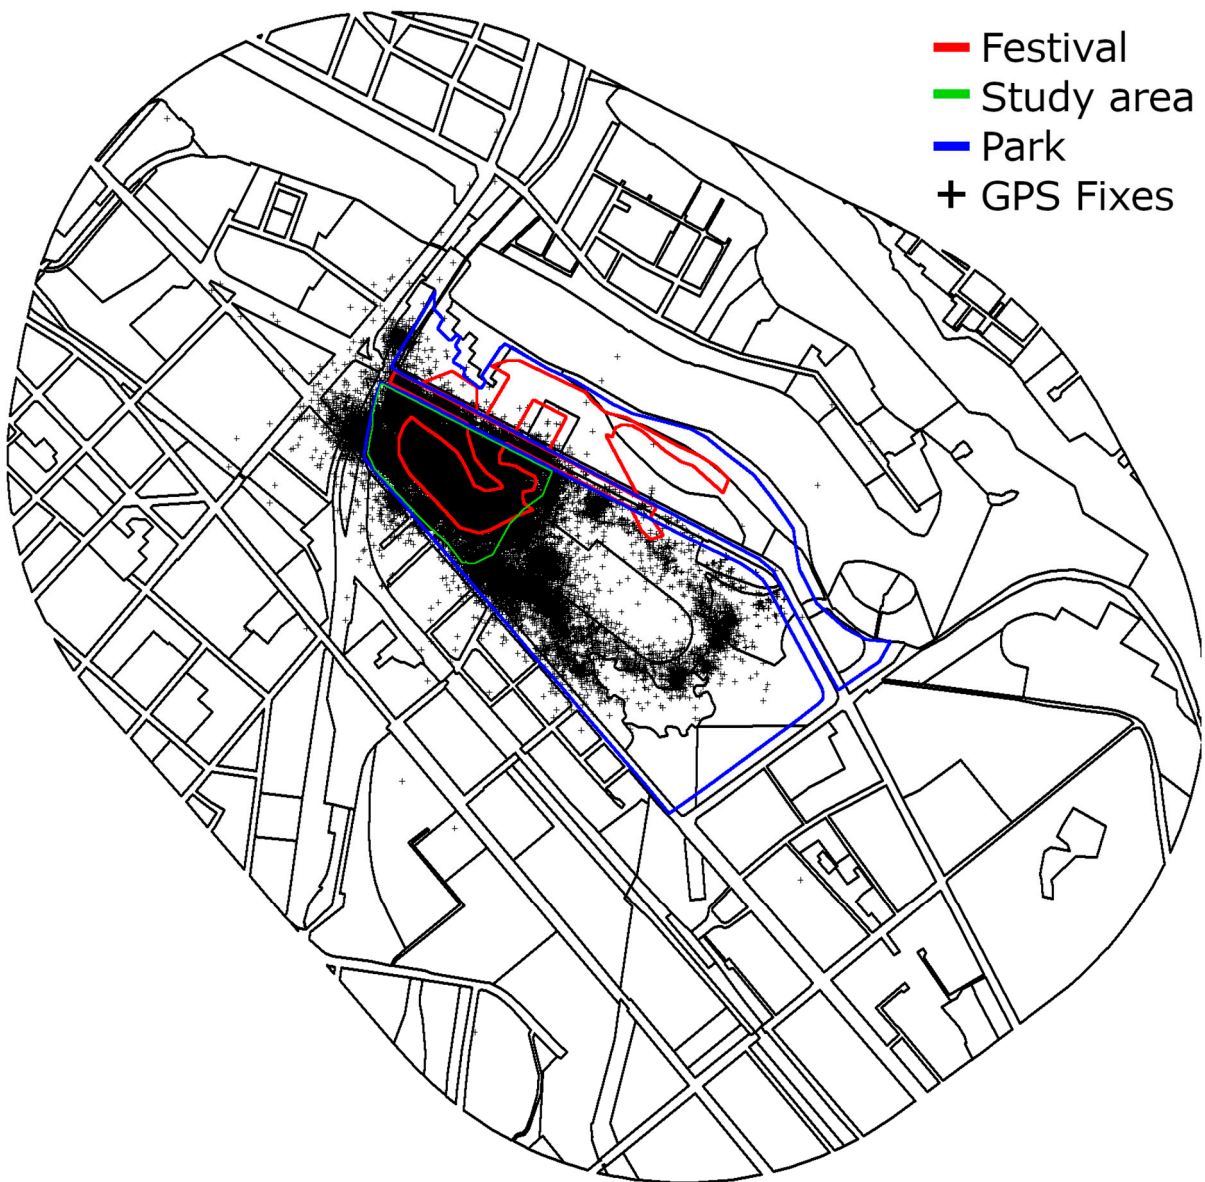

**Figure S2.** Map of the Park with surrounding area before the festival. The Park Area is indicated by the blue lines, the festival area is indicated by the red lines and the study area is indicated by the green line. GPS fixes are shown for all study hedgehogs. The majority of fixes are located in the study area. More than half of the study area was used for the festival. The study hedgehogs leave the park on a few occasions.



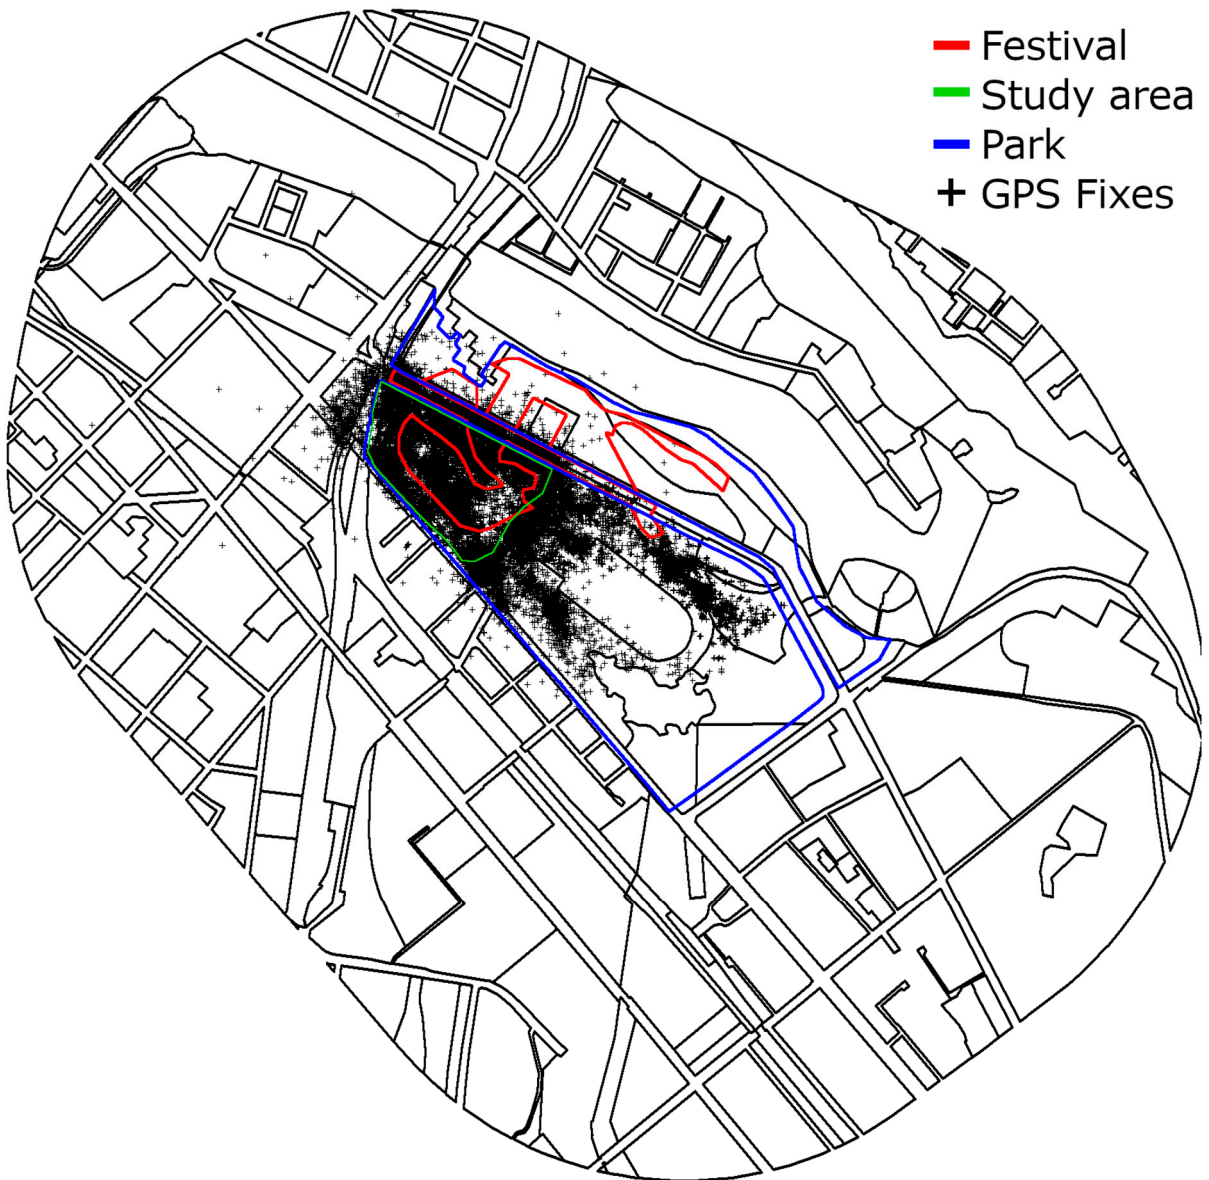

**Figure S3.** Map of the Park with surrounding area during the festival. The Park Area is indicated by the blue lines, the festival area is indicated by the red lines and the study area is indicated by the green line. GPS fixes are shown for all study hedgehogs. The majority of fixes are located in the study area. More than half of the study area was used for the festival. The study hedgehogs leave the park on a few occasions.

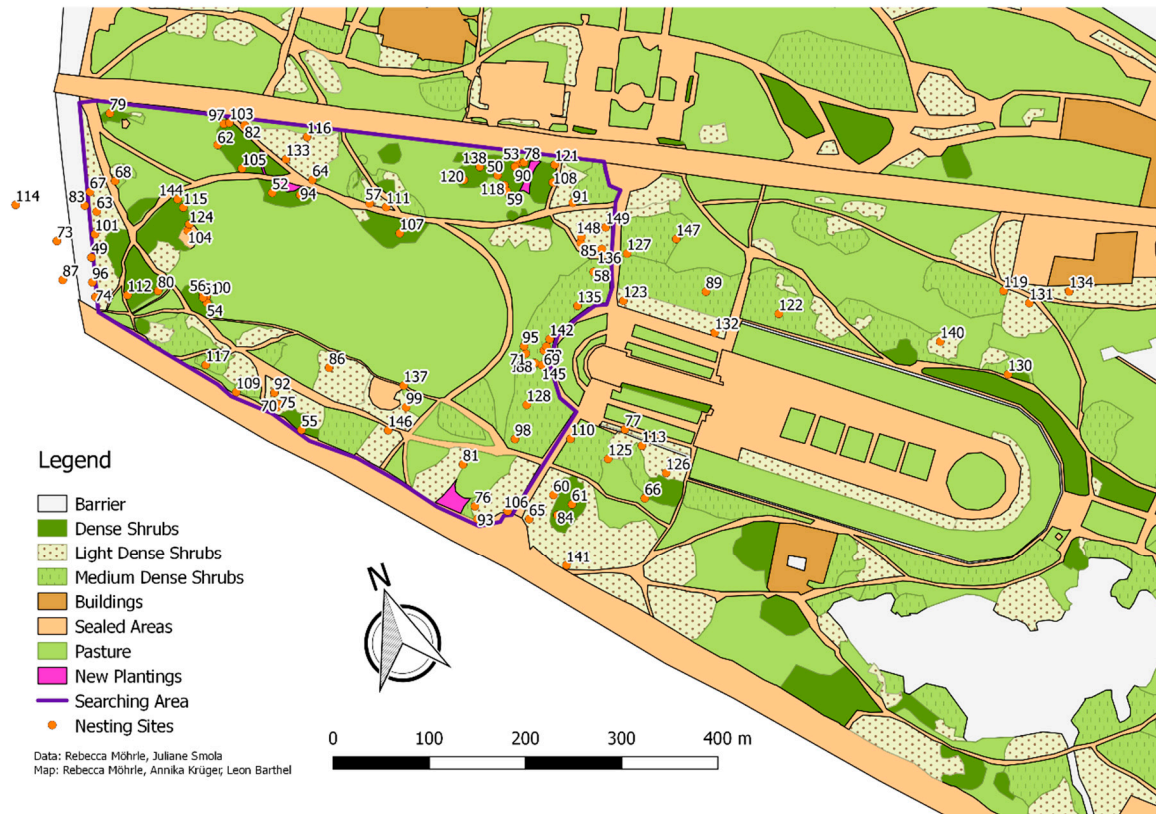

**Figure S4.** Map of all nest locations. Nests are restricted to areas covered by bushes. The majority of bushes are within the study area. Search area corresponds to the study area in Figures S1-S3.
